# Supplementary material
Source: publisher site journal article supplement (https://www.dovepress.com/article/373997)
Supplement: Supplementary file 1 [file get_supplementary_file.php]

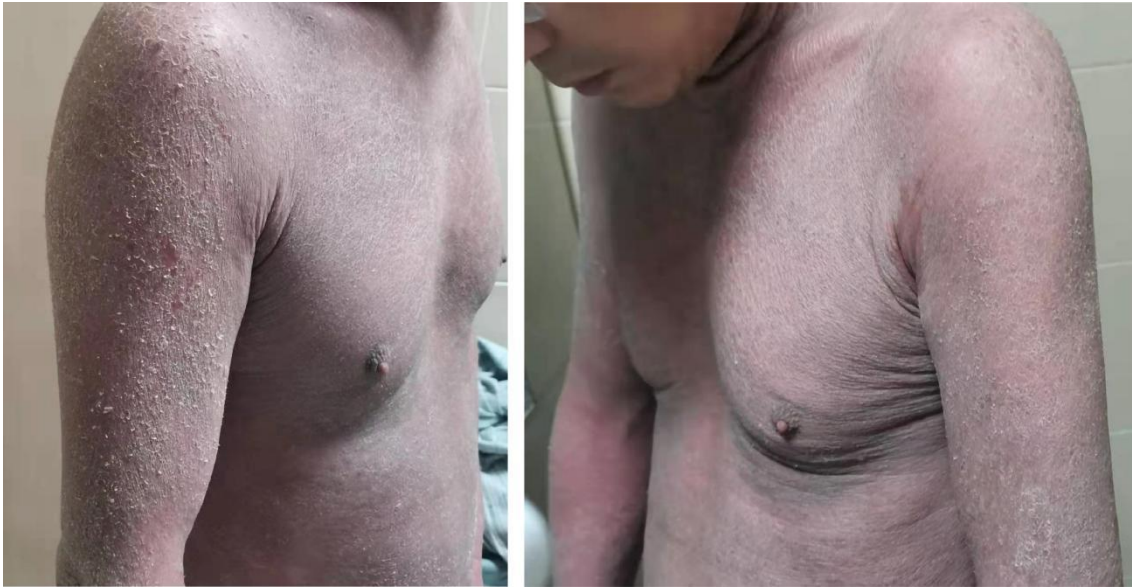

1

2 **Supplementary picture legends**

3 **Supplementary picture** Aggravated desquamation on the third day after third injection  
4 of dupilumab.
